# Supplementary material for: Chiral hydrogels facilitate rapid diabetic wound healing by promoting macrophage M2 polarization and cellular proliferation
Source: Royal Society of Chemistry journal article supplement (doi:10.1039/d3tc04463g), 2024-01-01
Supplement: d3tc04463g1.pdf [file d3tc04463g1.pdf]

## Supporting Information

### Chiral Hydrogels Facilitate Rapid Diabetic Wound Healing by Promoting Macrophage M2 Polarization and Cellular Proliferation.

Yi-ping Hu<sup>a,b</sup>, Kui Xiao<sup>b</sup>, Ma-chao Si<sup>c</sup>, Cai-xia Wang<sup>d</sup>, Yong Miao<sup>a,\*</sup>, Zhi-qi Hu<sup>a,\*</sup>

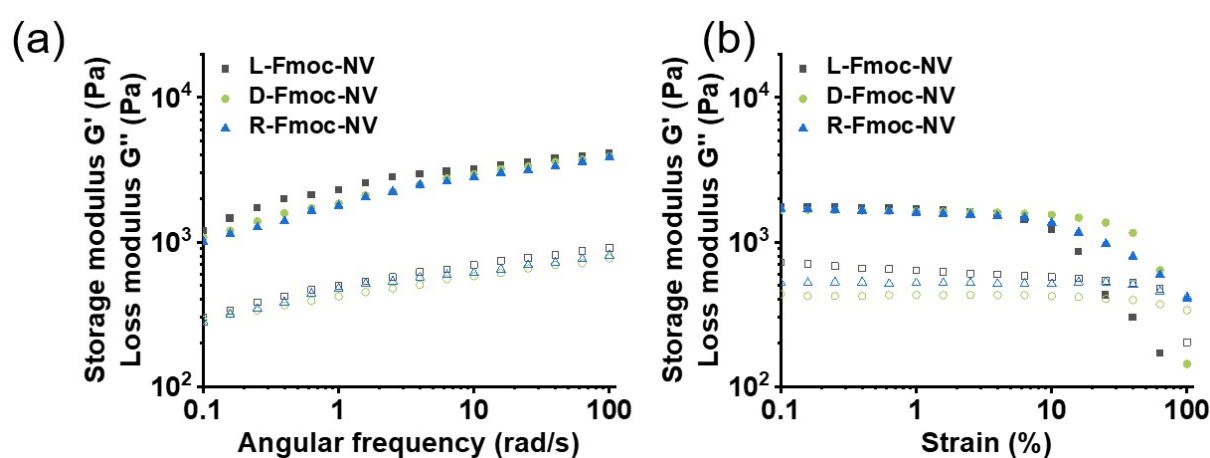

**Fig. S1** (a) The frequency sweep of L-Fmoc-NV, D-Fmoc-NV and R-Fmoc-NV hydrogel. (b) The strain sweep of L-Fmoc-NV, D-Fmoc-NV and R-Fmoc-NV hydrogel.

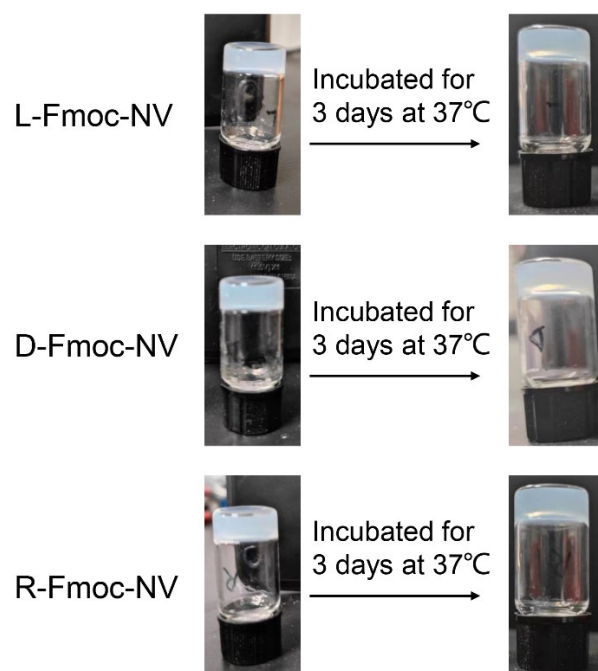

**Fig. S2** The images of these three hydrogels before and after incubating 3 days at 37°C.

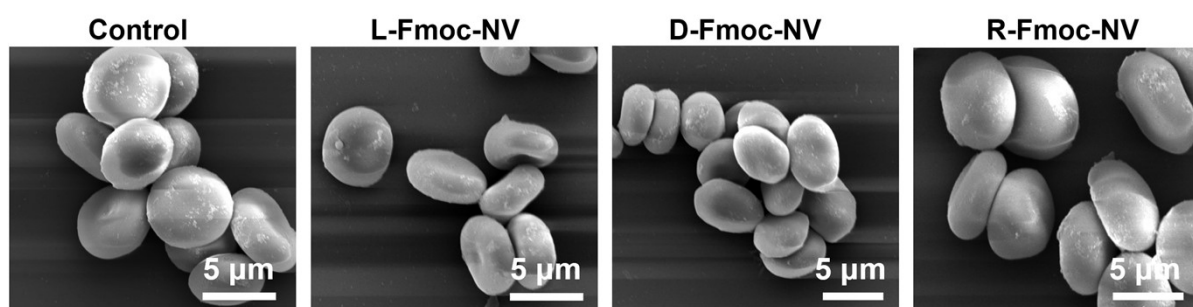

**Fig. S3** The SEM images of red blood cells after treatment with different hydrogels.

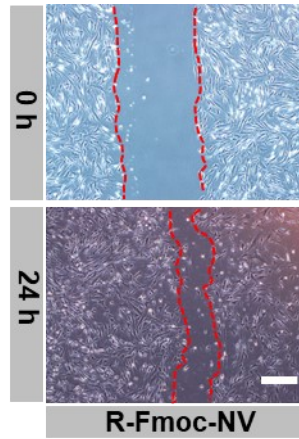

**Fig. S4** The cell migration ratio of HUVECs after being treated with R-Fmoc-NV for 1 day. Scale bar: 0.2 mm.

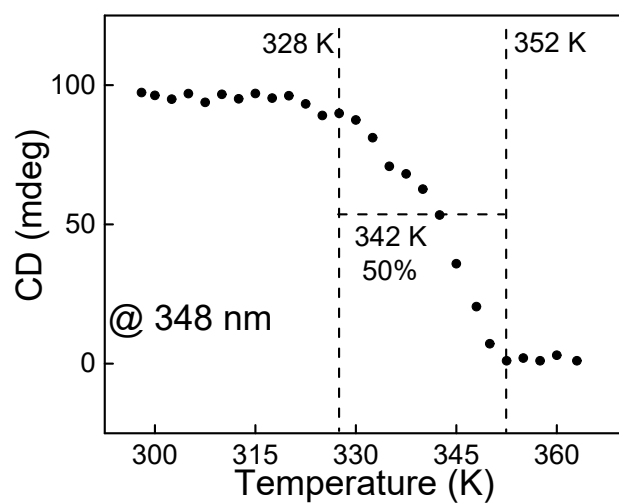

**Fig. S5** Temperature dependent CD signal of L-Fmoc-NV at 348 nm.

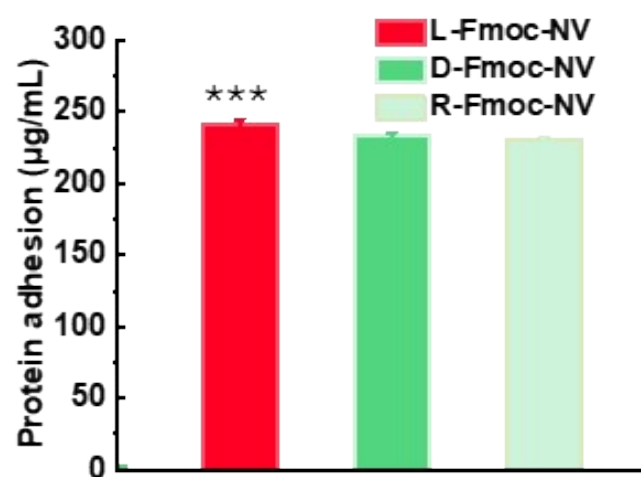

**Fig. S6** The protein adhesion ability of all hydrogels.

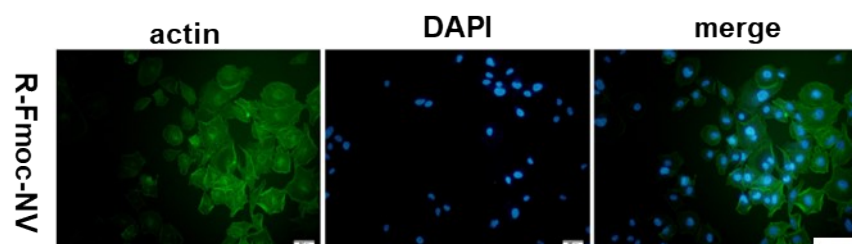

**Fig. S7** The immunofluorescent staining of HUVECs after being treated with R-Fmoc-NV. Green:  $\alpha$ -actin, blue: DAPI. Scale bar: 0.02 mm.

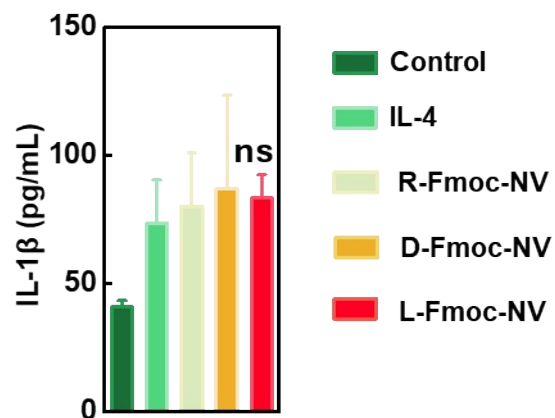

**Fig. S8** The relative proteins of IL-1 $\beta$  after being treated with different hydrogels. ns: no significant difference. \* $p < 0.05$ , \*\* $p < 0.01$ , and \*\*\* $p < 0.001$ .



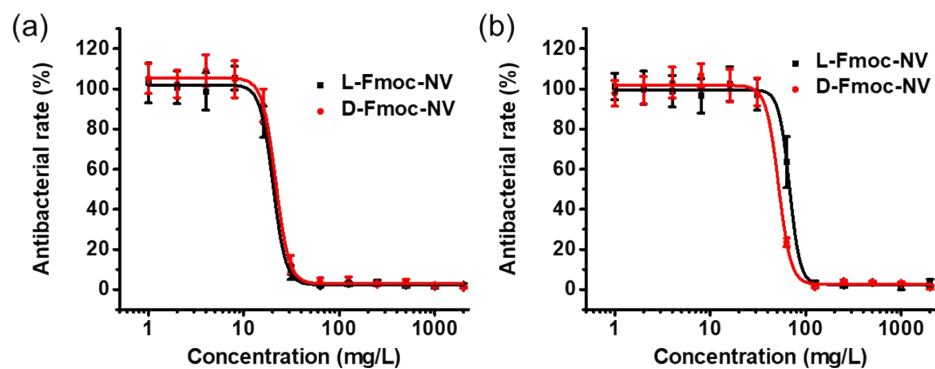

**Fig. S9** (a) The antibacterial rate of L-Fmoc-NV and D-Fmoc-NV hydrogel against to *S. aureus* at different concentration. (b) The antibacterial rate of L-Fmoc-NV and D-Fmoc-NV hydrogel against *E. coli* at different concentrations.

Table S1. List of Abbreviations

|        |                                          |
|--------|------------------------------------------|
| AFM    | Atomic Force Microscopy                  |
| CD     | Circular dichroism                       |
| CCK-8  | Cell Counting Kit-8                      |
| DMEM   | Dulbecco's Modified Eagle Medium         |
| D&I    | Diabetic and infected                    |
| ECM    | Extracellular matrix                     |
| ELISA  | Enzyme-linked immunosorbent assay        |
| FLIM   | Fluorescence lifetime imaging microscopy |
| FTIR   | Fourier transform infrared               |
| H&E    | Hematoxylin and Eosin                    |
| hRBCs  | Human red blood cells                    |
| HUVECs | Human umbilical vein endothelial cells   |
| OD     | Optical density                          |
| PS     | Polystyrene                              |
| SEM    | Scanning electron microscope             |
| TEM    | Transmission electron microscope         |
| TSB    | Tryptic soy broth                        |
| XRD    | X-Ray Diffraction                        |
